# Supplementary material for: Microplastics from textile origin – emission and reduction measures
Source: Royal Society of Chemistry journal article supplement (doi:10.1039/d1gc01589c), 2021-01-01
Supplement: d1gc01589c1.pdf [file d1gc01589c1.pdf]

## Microplastics from textile origin – emission and reduction measures

(Electronic Supplementary Information, ESI)

Ya-Qi Zhang,<sup>a</sup> Marianna Lykaki,<sup>a</sup> Mohammad Taher Alrajoula,<sup>b</sup> Marta Markiewicz,<sup>a</sup>  
Caroline Kraas,<sup>c</sup> Sabrina Kolbe,<sup>d</sup> Kristina Klinkhammer,<sup>d</sup> Maike Rabe,<sup>d</sup> Robert Klauer,<sup>e</sup>  
Ellen Bendt<sup>d</sup> and Stefan Stolte<sup>\*a</sup>

<sup>a</sup> Institute of Water Chemistry (IWC), Technische Universität Dresden, Berg Str. 66, 01069 Dresden, Germany. \*stefan.stolte@tu-dresden.de.

<sup>b</sup> Association of the German Sporting Goods Industry, Adenauerallee 134, 53113 Bonn, Germany.

<sup>c</sup> World Wide Fund For Nature (WWF) Germany, Reinhardtstr. 18, 10117 Berlin, Germany.

<sup>d</sup> Research Institute for Textile and Clothing (FTB), Faculty of Textile and Clothing Technology, Niederrhein University of Applied Science, Webschulstr. 31, 41065 Mönchengladbach, Germany.

<sup>e</sup> VAUDE Sport GmbH & Co. KG, i-team, 88069 Tettnang, Germany.

**S1.** Estimation of the release of fibrous microplastics (FMPs) in textile washing in terms of “moderate scenario” of washing.

1. According to the studies in **Table 1** in the main text, FMPs released after the 1<sup>st</sup> wash cycle were summarised in the range of 0.0018 – 0.042% w/w (termed as ‘x’);
2. Calculate the amount of new synthetic textiles that are consumed and washed based on the annual fibre production in 2018 (**Figure 2** in the main text):
  - a) the global production of fibres was 111 million tons (Mtons), in which 65% were synthetic fibres;
  - b) of which a share of 67% was for clothing production;<sup>1</sup>
  - c) 3 % loss of material between fibre and yarn; 6 % loss of material between textiles and finishing and garmenting;<sup>1</sup>
  - d) global population: 7.9 billion.

Therefore,

the annual amount of new synthetic textiles that are consumed and experienced washing is assumed with the calculation:

$$(111 \text{ Mtons} \cdot 65\% \cdot 67\%) \cdot (1 - 3\%) \cdot (1 - 6\%) \div 7.9 \text{ billion} \approx 5.5 \text{ kg new textiles/person}$$

this value, as mentioned in the main text, was comparable to the estimated weekly washing load according to the general household washing practice in Germany, i.e., a person generates on avg. 5.0 kg/week<sup>2</sup>. Therefore, it was assumed that the amount of new textiles i.e., 5.5 kg/person is washed once every week.

Regarding the washing cycles and release, according to peer-reviewed studies, FMPs shedding decreased in maximum to approximately 1/4 (ref<sup>3</sup>), 1/10 (ref<sup>4</sup>), 1/20 (ref<sup>5</sup>) after the 4<sup>th</sup>, 5<sup>th</sup> and 10<sup>th</sup> of washing, respectively relative to the 1<sup>st</sup> washing, and usually after 10 cycles the release became constant<sup>5</sup>. Therefore, the released FMPs per year (**M**) can be estimated with the consideration as below:

**Total FMP release (M)** = release after the 1<sup>st</sup> washing + release from 2<sup>nd</sup> to 10<sup>th</sup> cycles + constant release after the 10<sup>th</sup> washing

Consequently, the consideration turned into an equation was established, for per 100,000 population, with:

$$M = [x'] + [(x' \cdot \sqrt[4]{1/4}) \cdot (4 - 2)] + [x' \cdot 1/4] + [x' \cdot 1/10] + [(x'/10) \cdot \sqrt[5]{\frac{1}{20} \div \frac{1}{10}} \cdot (5 - 1)] + [x' \cdot 1/20] + [(x' \cdot 1/20) \cdot (52 - 10)] \cdot 100,000 \text{ population}$$

where

- a) the 7 terms in the equation (shown in []) indicate the FMP release, from the left to the right:
  - after the 1<sup>st</sup> wash cycle
  - release between the 1<sup>st</sup> and 4<sup>th</sup> washing, i.e., the 2<sup>nd</sup> and 3<sup>rd</sup> washing

- after the 4<sup>th</sup> washing
- after the 5<sup>th</sup> washing
- release between the 5<sup>th</sup> and 10<sup>th</sup> washing, i.e., the 6<sup>th</sup>, 7<sup>th</sup>, 8<sup>th</sup> and 9<sup>th</sup> washing
- after the 10<sup>th</sup> wash cycle, and
- the release after 10 washing cycles for the following weeks in a year (constantly, a total of 52 weeks per year).

b) The term  $x'$ , i.e., FMP released after the 1<sup>st</sup> wash cycle, can be calculated using:

$$x' = x \cdot 5.5 \text{ kg/person}$$

for example, with the abovementioned release range obtained in **Table 1** (0.0018 – 0.042% w/w,  $x$ ), it can be calculated:

- low release in the 1<sup>st</sup> washing:

$$x'_{\text{low}} = 0.0018 \%w/w \cdot 5.5 \text{ kg/person}$$

- high release in the 1<sup>st</sup> washing:

$$x'_{\text{high}} = 0.042 \%w/w \cdot 5.5 \text{ kg/person}$$

In sum, for each reviewed study in **Table 1** the amount of FMP shed from the 5.5 kg/person new textiles during the whole year of washing can be calculated, in a scale of 100,000 population (**M**). This leads to an overall range of 50.6 – 1180 kg/year/100,000 population.

**S2.** Estimation of the release of FMPs in textile washing in terms of “fast-fashion mode” of washing (i.e., “worst-case” scenario).

In this case, the new textiles (5.5 kg/person) were assumed to be washed once during use and subject to disposal. The annual amount of FMP release was calculated with:

$$x'_{\text{low}} = 0.0018 \%w/w \cdot 5.5 \text{ kg/person} \cdot 52 \text{ weeks}$$

$$x'_{\text{high}} = 0.042 \%w/w \cdot 5.5 \text{ kg/person} \cdot 52 \text{ weeks}$$

This leads to an overall range of 515 – 12,012 kg/year for per 100,000 population.

## References

- 1 Ellen MacArthur Foundation, *A new textiles economy: Redesigning fashion's future*, 2017 (<http://www.ellenmacarthurfoundation.org/publications>).
- 2 A. Kruschwitz, A. Karle, A. Schmitz and R. Stamminger, *Int. J. Consum. Stud.*, 2014, **38**, 265–277.
- 3 M. R. Kelly, N. J. Lant, M. Kurr and J. G. Burgess, *Environ. Sci. Technol.*, 2019, **53**, 11735–11744.
- 4 M. Sillanpää and P. Sainio, *Environ. Sci. Pollut. Res.*, 2017, **24**, 19313–19321.
- 5 U. Pirc, M. Vidmar, A. Mozer and A. Kržan, *Environ. Sci. Pollut. Res.*, 2016, **23**, 22206–22211.
